# Supplementary material
Source: Springer Nature journal article supplement (https://www.springermedizin.de/resource/supplementary/12974_2011_468_MOESM5_ESM.pdf/9601376)

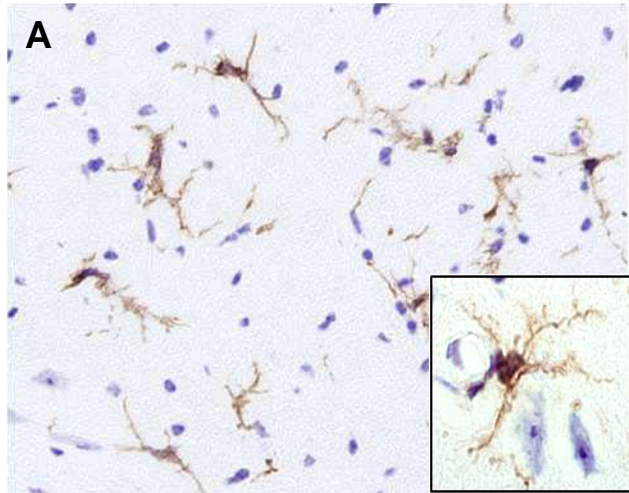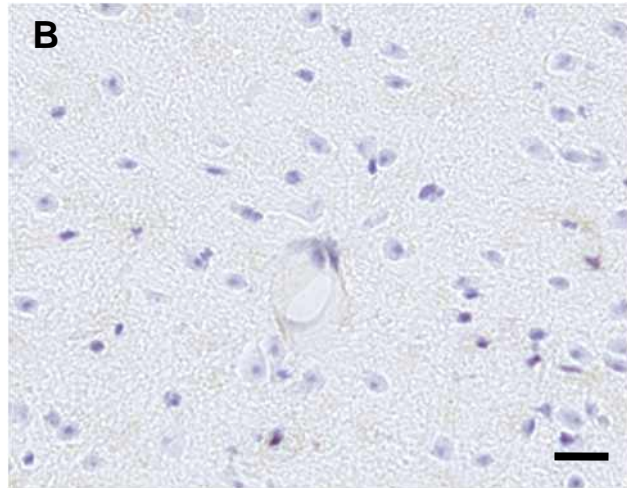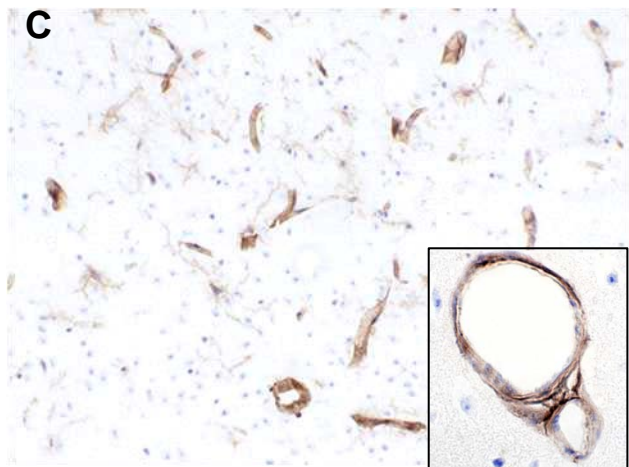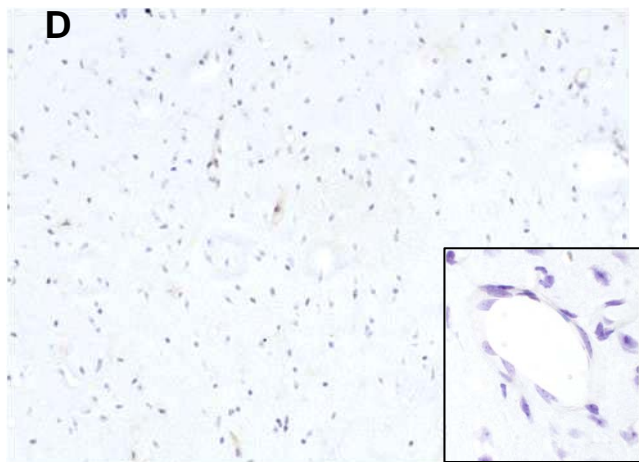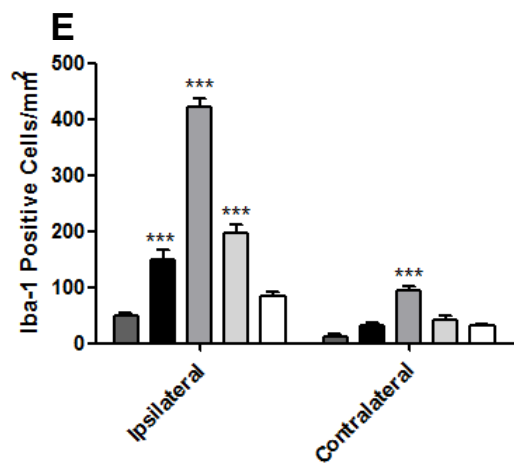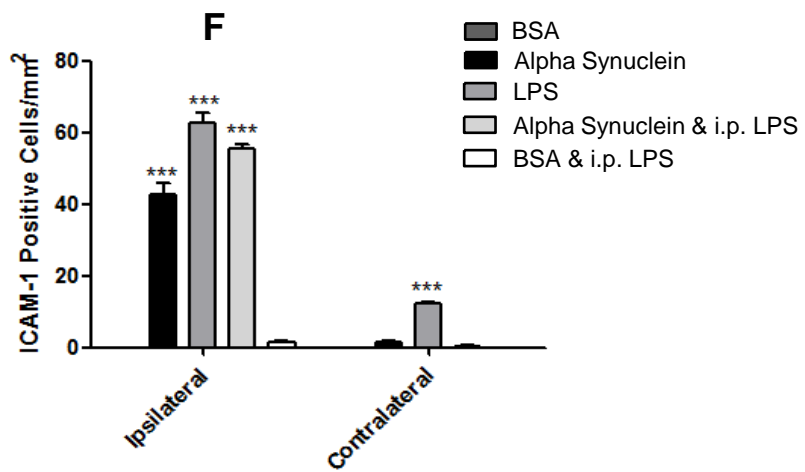

■ BSA  
 ■ Alpha Synuclein  
 ■ LPS  
 ■ Alpha Synuclein & i.p. LPS  
 □ BSA & i.p. LPS

Supplement: MOESM5 [file 9601376]
